# Supplementary material
Source: Springer Nature journal article supplement (https://www.springermedizin.de/resource/supplementary/13058_2011_3038_MOESM10_ESM.pdf/9703138)

**a**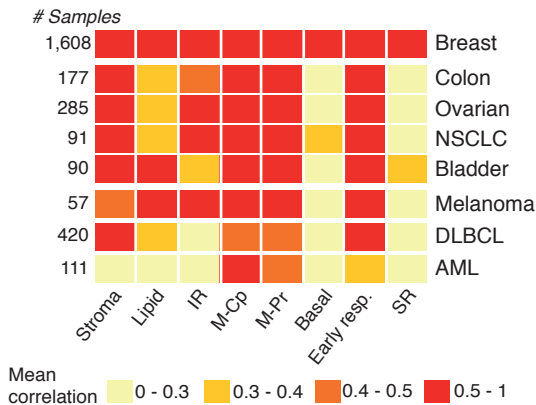**b**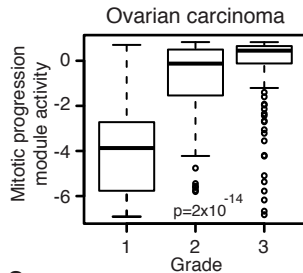**c**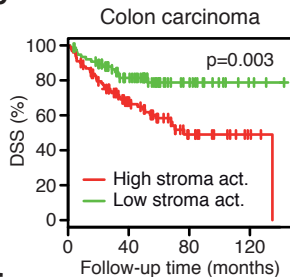**d**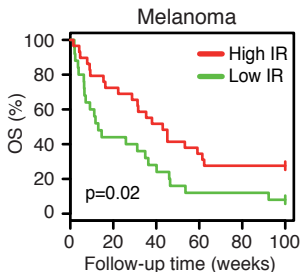**e**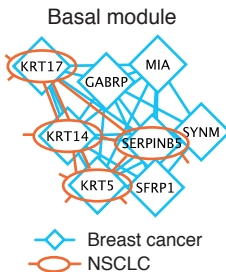**f**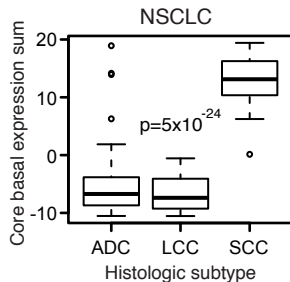

Supplement: MOESM10 [file 9703138]
